# Supplementary material for: SERS-Based Aptasensor for Rapid Quantitative Detection of SARS-CoV-2
Source: MDPI journal article supplement (doi:10.3390/nano11061394), 2021-05-25
Supplement: s1 [file s1]

# SERS-Based Aptasensor for Rapid Quantitative Detection of SARS-CoV-2

Elena Zavyalova<sup>1,\*</sup>, Ogan Ambartsumyan<sup>2</sup>, Gleb Zhdanov<sup>1</sup>, Dmitry Gribanyov<sup>3</sup>, Vladimir Gushchin<sup>4</sup>, Artem Tkachuk<sup>4</sup>, Elena Rudakova<sup>5</sup>, Maria Nikiforova<sup>4</sup>, Nadezhda Kuznetsova<sup>4</sup>, Liubov Popova<sup>4</sup>, Bakhtiyar Verdiev<sup>4</sup>, Artem Alatyrev<sup>4</sup>, Elena Burtseva<sup>4</sup>, Anna Ignatieva<sup>4</sup>, Anna Iliukhina<sup>4</sup>, Inna Dolzhikova<sup>4</sup>, Alexander Arutyunyan<sup>6</sup>, Alexandra Gambaryan<sup>7</sup> and Vladimir Kukushkin<sup>3,\*</sup>

<sup>1</sup> Chemistry Department, Lomonosov Moscow State University, 119991 Moscow, Russia; gleb.zhdanov@chemistry.msu.ru

<sup>2</sup> Department of Microbiology, Virology and Immunology, I.M. Sechenov First Moscow State Medical University, 125009 Moscow, Russia; ogan-mail@mail.ru

<sup>3</sup> Institute of Solid State Physics of Russian Academy of Science, 142432 Chernogolovka, Russia; digrib@gmail.com

<sup>4</sup> National Research Center for Epidemiology and Microbiology named after the honorary academician N. F. Gamaleya, 123098 Moscow, Russia; wowaniada@gmail.com (V.G.); artem.p.tkachuk@gmail.com (A.T.); marianikiforova@inbox.ru (M.N.); nadyakuznetsova0@gmail.com (N.K.); ljubovprokudina@gmail.com (L.P.); yuryevpolskei@yandex.ru (B.V.); artem.alatyrev@gmail.com (A.A.); elena-burtseva@yandex.ru (E.B.); valgella@yandex.ru (A.I.); sovanya97@yandex.ru (A.I.); i.dolzhikova@gmail.com (I.D.)

<sup>5</sup> Institute of Physiologically Active Compounds of Russian Academy of Science, 142432 Chernogolovka, Russia; evladru@mail.ru

<sup>6</sup> Belozersky Research Institute of Physico-Chemical Biology, Lomonosov Moscow State University, 119991 Moscow, Russia; Alarut@genebee.msu.ru

<sup>7</sup> Chumakov Federal Scientific Center for Research and Development of Immune and Biological Products RAS, 108819 Moscow, Russia; al.gambaryan@gmail.com

\* Correspondence: Correspondence: zlenka2006@gmail.com (E.Z.); kukushvi@mail.ru (V.K.)

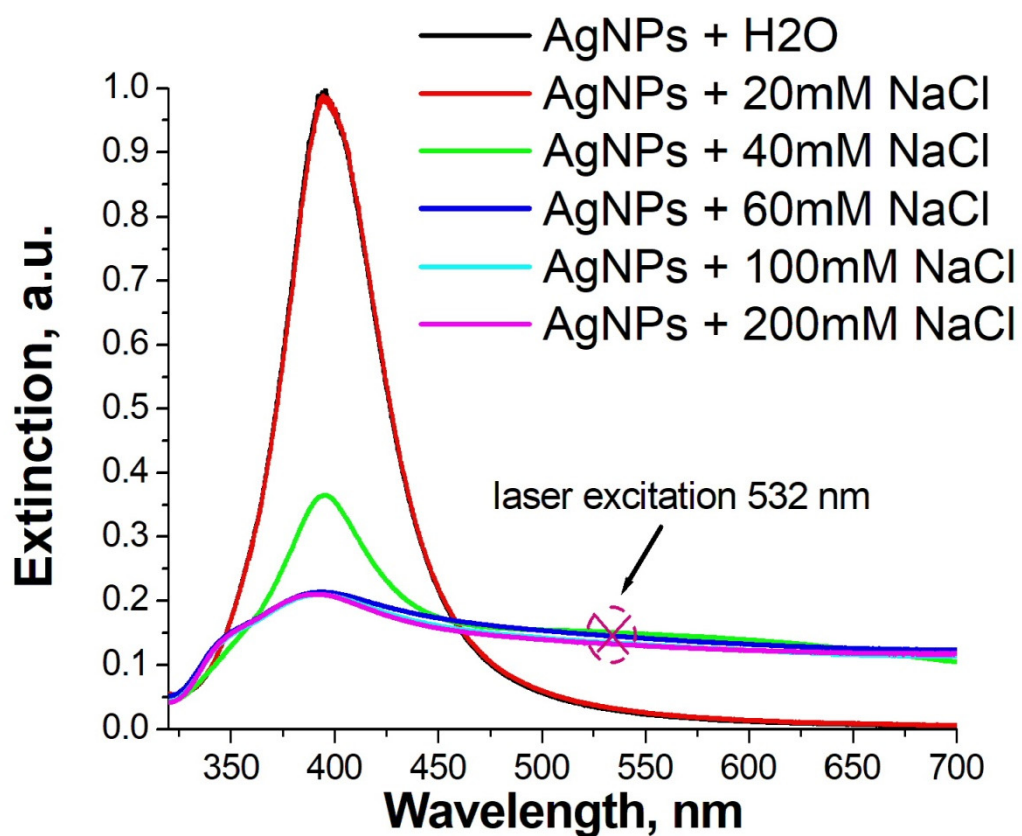

Figure S1. UV-Vis spectroscopy of colloidal silver solutions.

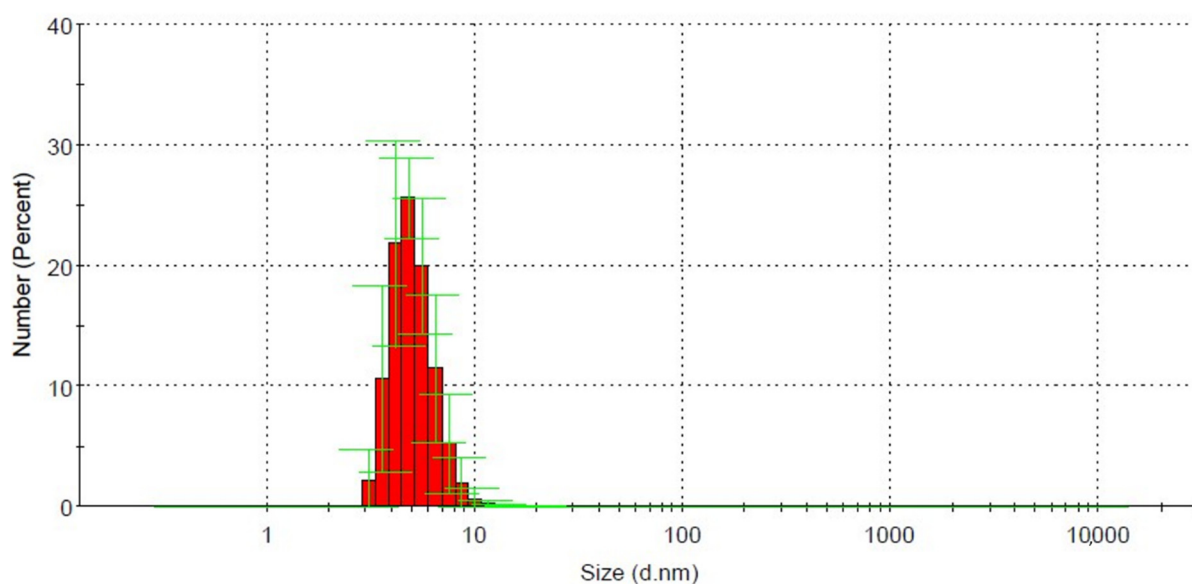

Figure S2. Dynamic Light Scattering (DLS) of colloidal silver solutions.

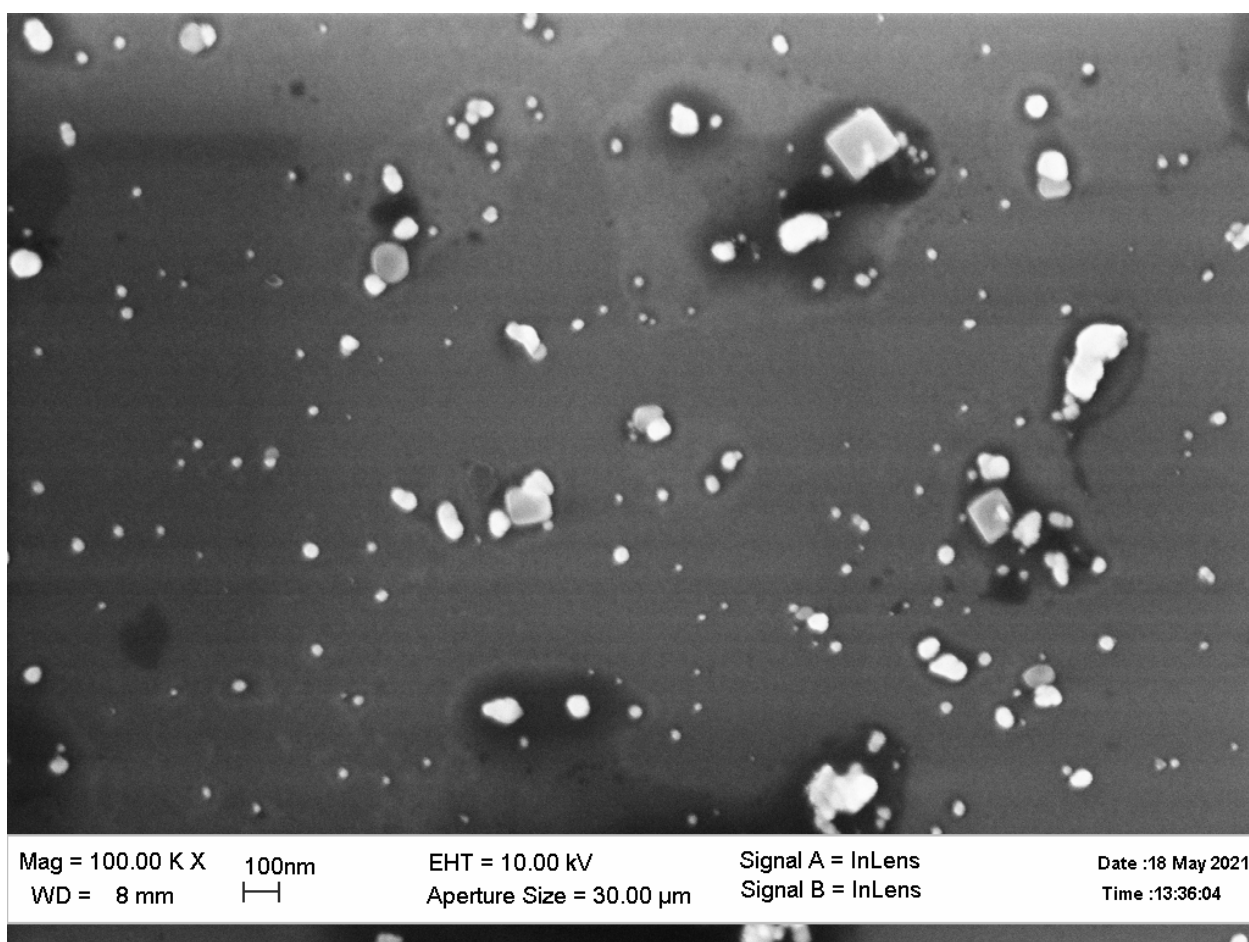

Figure S3. SEM of AgNPs

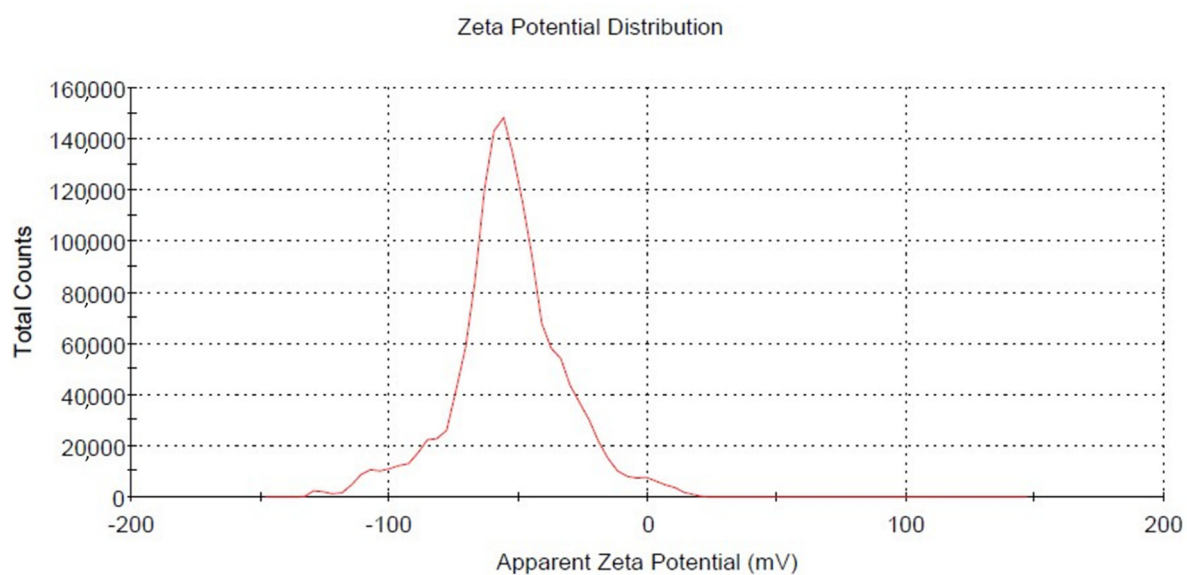

Figure S4.  $\zeta$ -potential of AgNPs

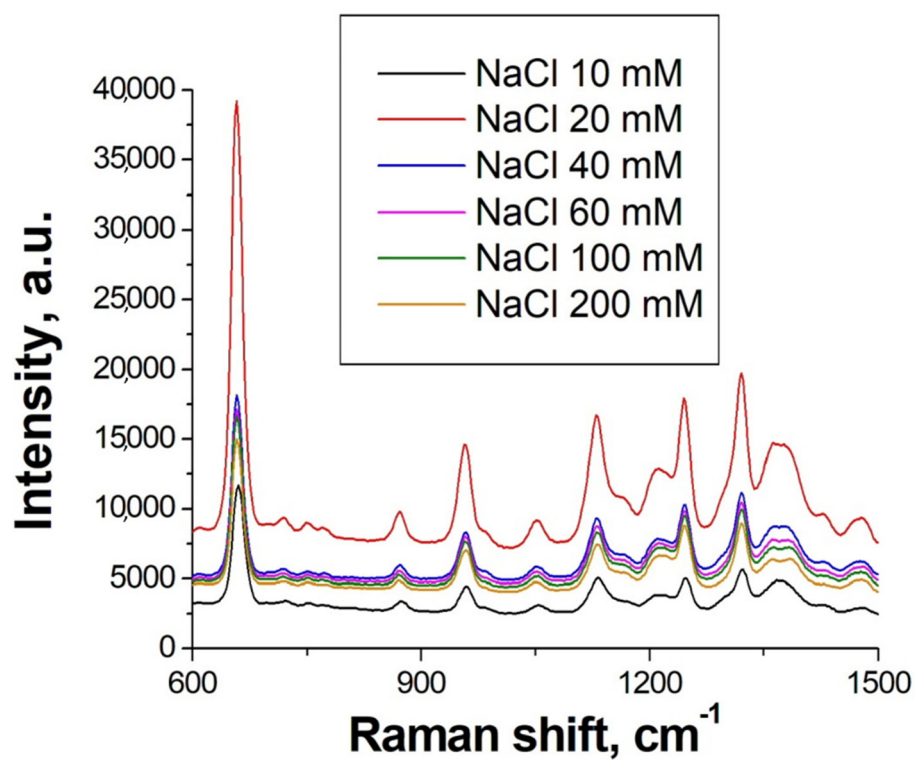

Figure S5. Spectra of the test substance (2 mM xanthine) at different ionic strengths of the solution.

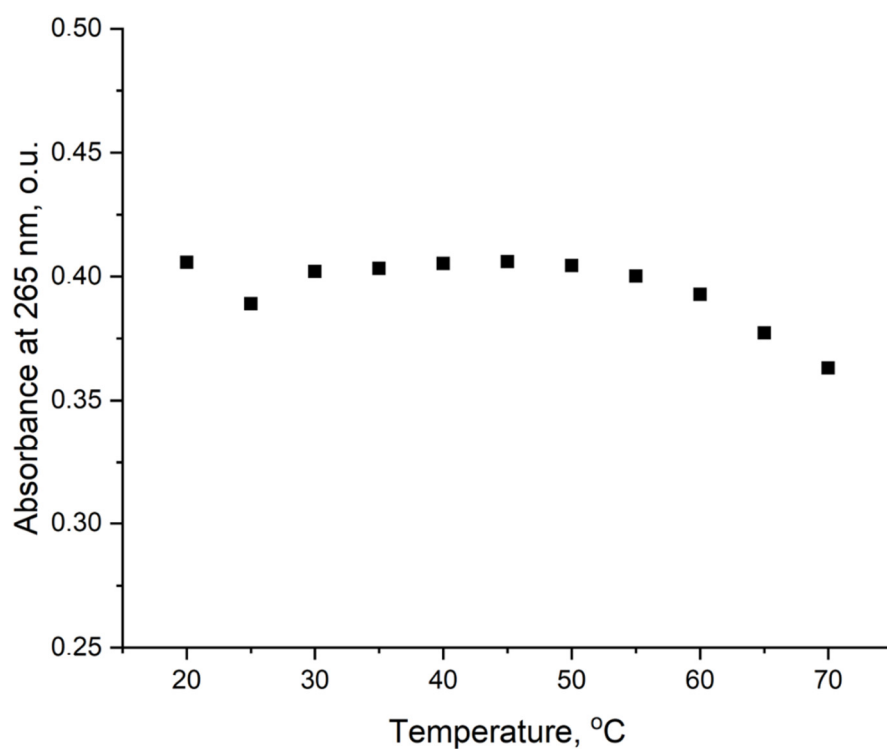

Figure S6. UV-spectra of RBD-1C (during melting in potassium buffer).
